# Supplementary material for: Immunization with the H5N1 Recombinant Vaccine Candidate Induces High Protection in Chickens against Vietnamese Highly Pathogenic Avian Influenza Virus Strains
Source: PubMed Central journal article supplement (PMC7348806; doi:10.3390/vaccines8020159), 2020-04-02
Supplement: vaccines-08-00159-s001.pdf [file vaccines-08-00159-s001.pdf]

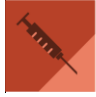

Supplementary Material

```

      10      20      30      40      50      60      70      80
HT2_2014_origin  .....|.....|.....|.....|.....|.....|.....|.....|.....|.....|
HT2_2014_muta   TAGTACTAAGCATATTCGTCAGGGAGCAAAGCAGGGGTCTAATCTGTCAA.....|.....|
      90      100     110     120     130     140     150     160
HT2_2014_origin AACAAATCAGCCTGTCAAAAGCGATCATATTTGCATTGGTTATCATGCAAAATACTCGACAGAGCAGGTTGACACAATAA
HT2_2014_muta   T I S L V K S D H I C I G Y H A N N S T E Q V D T I
      170     180     190     200     210     220     230     240
HT2_2014_origin TGGAAAAGAAAGCTTACTGTACACATGCCCCAAGACATACCTGGAAAAGACACCAATGGGAAGCTCTGCAGATCTAAATGGA
HT2_2014_muta   M E K N V T V T H A Q D I L E K T H N G K L C D L N G
      250     260     270     280     290     300     310     320
HT2_2014_origin GTGAAGCCTCTGATTTTAAAGATTGTAGTGTAGCAGGATGGCTCCTCGAAATCCATTGTGACGAATTCATCAATGT
HT2_2014_muta   V K P L I L K D C S V A G W L L G N P L C D E F I N V
      330     340     350     360     370     380     390     400
HT2_2014_origin GCCAGAAATGGTCTTACATAGTAGAGAAGCCCAATCCAGCCAATGACCTCTGTACCAGGAAATTTCAACGATTAATGAAG
HT2_2014_muta   P E W S Y I V E K P N P A N D L C Y P G N F N D Y E
      410     420     430     440     450     460     470     480
HT2_2014_origin AATTGAAACCTATTGAGCAGGATAAACCAATTTTGAGAAAATACAGATCAATCCCAAGATTCCTGGTCAAAACCATGAA
HT2_2014_muta   E L K H L L S R I N H F E K I Q I I P K D S W S N H E
      490     500     510     520     530     540     550     560
HT2_2014_origin GCCTCAATGGGGGTGAGCGCAGCATGTTCCATACCAGGAAATTCCTCCTTCTCAGAAATGTTGGTGGCTTATCAAAA
HT2_2014_muta   A S L G V S A A C S Y Q G N S S F F R N V V W L I K K
      570     580     590     600     610     620     630     640
HT2_2014_origin GGACAATGCATACCCAAACAATAAAGAAAGGCTACAATAATACCAACCGAGAAGATCTATTGATACGTGGGGAAATCCACC
HT2_2014_muta   D N A Y P T I K K G Y N N T N R E D L L I L W G I H
      650     660     670     680     690     700     710     720
HT2_2014_origin ATCCTAATGATGAGGCGGAACAGACAAGGCTCTACCAAAACCCAACTACCTATAATTCATTGGGACTCAACACATAAAC
HT2_2014_muta   H P N D E A E Q T R L Y Q N P T T Y I S I G T S T L N
      730     740     750     760     770     780     790     800
HT2_2014_origin CAGAGATTGGTACCAAAAATAGCCACTAGATCCAAAATAAACGGGCAAAGTGGCAGGATAGATTTCTTCTGGACAATTTT
HT2_2014_muta   Q R L V P K I A T R S K I N G Q S G R I D F F W T I L
      810     820     830     840     850     860     870     880
HT2_2014_origin AAAACCGAATGACGCAATCCACTTCGAGAGTAATGGGAATTCATTGCTCCAGAATATCGGTACAAAATTTGCAAGAAGG
HT2_2014_muta   K P N D A I H F E S N G N F I A P E Y A Y K I V K K
      890     900     910     920     930     940     950     960
HT2_2014_origin GAGACTCCACATCATGAGAAGTGAAGTGGAAATATGGTAACTGCACACCCAGGTGTCAGACTCCAATAGGGGCGATAAAC
HT2_2014_muta   G D S T I M R S E V E Y G N C N T R C Q T P I G A I N

```



**Figure 1. Stability of the artificial HA gene from the rescued virus was validated by sequencing.** The 5' and 3' noncoding sequence in HT2\_2014\_muta were designed according to the molecular method described in Reference [14], including conserved regions between different influenza A subtypes (underlined) and the *BsmBI* recognition site (*italic*). The pathogenic region of HA from the original HPAI strain (HT2\_2014\_origin, IBT data collection) was modified as expected (HT2\_2014\_muta). The red arrow indicates the removal of the pathogenic region.

**Table 1.** Safety analysis of the rescued recombinant H5N1 virus in immunized chickens.

| Immunization <sup>a</sup>   | Total chicken number | Survival number | Chicken number with clinical outcomes <sup>b</sup> | Overall IVPI <sup>c</sup> |
|-----------------------------|----------------------|-----------------|----------------------------------------------------|---------------------------|
| Control (PBS)               | 10                   | 10/10           | 0/10                                               | 0                         |
| IBT-RG02                    | 10                   | 10/10           | 0/10                                               | 0                         |
| NAVET-Vifluvac <sup>d</sup> | 10                   | 10/10           | 0/10                                               | 0                         |

<sup>a</sup>Vaccines were given to 3-week-old chickens via the intramuscular (IM) route as a single dose;

<sup>b</sup>Clinical outcomes: chickens with symptoms of flu disease after immunization (according to body weight loss and OIE manual on assessment of sick and severely sick chickens); <sup>c</sup>The intravenous pathogenicity index (IVPI) was scored for each chicken and the mean value was calculated;

<sup>d</sup>The NAVET-Vifluvac vaccine was used as positive control.
